# Supplementary material for: Characterisation of the Phenolic Profile of Acacia retinodes and Acacia mearnsii Flowers’ Extracts
Source: MDPI journal article supplement (doi:10.3390/plants11111442), 2022-05-28
Supplement: s1 [file s1]

## Supplementary Material

**Table S1.** Data validation (analysis by HPLC/DAD)

| Compound                   | Linear range<br>( $\mu\text{g/mL}$ ) | Linearity*           |                     | $R^2$ *             | Lower Limit<br>of<br>quantitation<br>( $\mu\text{g/mL}$ ) |
|----------------------------|--------------------------------------|----------------------|---------------------|---------------------|-----------------------------------------------------------|
|                            |                                      | Slope                | Intercept           |                     |                                                           |
| Catechol                   | 3.13 - 100                           | $39.35 \pm 5.51$     | $-33.47 \pm 2.71$   | $0.9989 \pm 0.0015$ | 3.13                                                      |
| Gallic acid                | 0.78 - 50                            | $175.90 \pm 14.95$   | $-12.66 \pm 1.30$   | $0.9999 \pm 0.0002$ | 0.78                                                      |
| 4-Hydroxybenzoic acid      | 3.13 - 100                           | $412.17 \pm 20.20$   | $567.21 \pm 83.95$  | $0.9976 \pm 0.0018$ | 3.13                                                      |
| 4-Hydroxybenzaldehyde      | 0.78 - 50                            | $524.51 \pm 52.45$   | $-73.08 \pm 3.07$   | $0.9999 \pm 0.0009$ | 0.78                                                      |
| Vanillin                   | 0.78 - 25                            | $97.82 \pm 14.28$    | $-31.23 \pm 3.19$   | $0.9998 \pm 0.0012$ | 0.78                                                      |
| Syringaldehyde             | 1.56 - 50                            | $239.73 \pm 5.75$    | $150.48 \pm 21.82$  | $0.9989 \pm 0.0047$ | 1.56                                                      |
| Chlorogenic acid           | 0.78 - 50                            | $39.23 \pm 2.24$     | $-39.50 \pm 2.33$   | $0.9986 \pm 0.0033$ | 0.78                                                      |
| Caffeic acid               | 0.78 - 50                            | $125.95 \pm 11.08$   | $-53.10 \pm 1.49$   | $0.9971 \pm 0.0025$ | 0.78                                                      |
| <i>p</i> -Coumaric acid    | 0.78 - 50                            | $311.57 \pm 44.87$   | $-195.51 \pm 15.05$ | $0.9998 \pm 0.0015$ | 0.78                                                      |
| trans-Cinnamic acid        | 0.78 - 25                            | $1531.00 \pm 104.11$ | $-530.96 \pm 60.53$ | $0.9999 \pm 0.0008$ | 0.78                                                      |
| Coniferaldehyde            | 0.78 - 50                            | $150.70 \pm 22.45$   | $-74.19 \pm 7.12$   | $0.9996 \pm 0.0011$ | 0.78                                                      |
| Furfural                   | 1.56 - 50                            | $907.15 \pm 17.24$   | $-434.15 \pm 46.15$ | $0.9998 \pm 0.0004$ | 1.56                                                      |
| 5-Methylfurfural           | 1.56 - 50                            | $177.18 \pm 9.57$    | $-125.51 \pm 9.04$  | $0.9998 \pm 0.0017$ | 1.56                                                      |
| (+)-Catechin               | 1.56 - 50                            | $23.78 \pm 2.81$     | $-10.05 \pm 0.55$   | $0.9993 \pm 0.0006$ | 1.56                                                      |
| (-)-Epicatechin            | 1.56 - 50                            | $16.97 \pm 2.55$     | $-6.77 \pm 0.29$    | $0.9997 \pm 0.0027$ | 1.56                                                      |
| Rutin                      | 0.78 - 50                            | $31.52 \pm 3.22$     | $-38.66 \pm 3.29$   | $0.9995 \pm 0.0014$ | 0.78                                                      |
| Myricitrin                 | 0.78 - 50                            | $27.87 \pm 2.56$     | $-12.10 \pm 1.71$   | $0.9998 \pm 0.0008$ | 0.78                                                      |
| Myricetin                  | 0.78 - 50                            | $51.36 \pm 3.13$     | $-9.42 \pm 1.42$    | $0.9999 \pm 0.0010$ | 0.78                                                      |
| Quercetin                  | 0.78 - 50                            | $51.50 \pm 7.57$     | $-2.47 \pm 0.24$    | $0.9998 \pm 0.0005$ | 0.78                                                      |
| Kaempferol                 | 0.78 - 50                            | $58.83 \pm 6.59$     | $6.75 \pm 0.83$     | $0.9998 \pm 0.0003$ | 0.78                                                      |
| 4',5,7-Trihydroxyflavanone | 0.78 - 25                            | $239.15 \pm 11.24$   | $-48.62 \pm 7.39$   | $0.9998 \pm 0.0009$ | 0.78                                                      |

**Table S2.** Data validation (analysis by UHPLC/ESI-QTOF-MS)

| Polyphenols analysed in negative ionization mode |                      |           |           |                |                                     |
|--------------------------------------------------|----------------------|-----------|-----------|----------------|-------------------------------------|
| Compounds                                        | Linear range (µg/mL) | Linearity |           |                |                                     |
|                                                  |                      | Slope     | Intercept | R <sup>2</sup> | Lower limit of quantitation (µg/mL) |
| Gentisic acid                                    | 0.125- 5             | 4.84E+05  | 7.59E+04  | 0.997          | 0.125                               |
| Protocatechuic acid                              | 0.5-5                | 8.16E+04  | 5.52E+03  | 0.998          | 0.5                                 |
| Salicylic acid                                   | 0.125- 5             | 7.62E+05  | 3.30E+05  | 0.990          | 0.125                               |
| Aesculetin                                       | 0.125- 5             | 2.95E+06  | 9.22E+05  | 0.990          | 0.125                               |
| Phlorizin                                        | 0.125- 5             | 6.80E+05  | 2.29E+05  | 0.984          | 0.125                               |
| Naringenin (aglycone)                            | Response factor:     | 2.67E+05  |           |                |                                     |
| Chrysin (aglycone)                               | 0.5-10               | 3.56E+07  | 9.90E+07  | 0.990          | 0.5                                 |
| Kaempferol (aglycone)                            | 0.5-10               | 1.47E+05  | 9.44E+04  | 0.997          | 0.5                                 |
| Kaempferol 3- <i>O</i> -glucoside                | 0.125- 5             | 9.23E+05  | 1.00E+05  | 0.997          | 0.125                               |
| Kaempferol 3- <i>O</i> -rutinoside               | 0.125- 5             | 7.34E+05  | 2.02E+05  | 0.990          | 0.125                               |
| Luteolin (aglycone)                              | 0.125- 5             | 4.07E+05  | 6.16E+04  | 0.996          | 0.125                               |
| Quercetin (aglycone)                             | 0.125- 5             | 9.44E+05  | 6.04E+04  | 0.996          | 0.125                               |
| Quercetin-3- <i>O</i> -galactoside               | 0.5-5                | 2.58E+05  | 2.74E+04  | 0.999          | 0.5                                 |
| Quercetin-3- <i>O</i> -glucoside                 | 0.125- 5             | 9.03E+05  | 4.16E+04  | 0.999          | 0.125                               |
| Quercetin-3- <i>O</i> -rhamnoside                | 0.125- 5             | 6.36E+05  | 1.69E+05  | 0.990          | 0.125                               |
| Delphinidin 3- <i>O</i> -rutinoside*             | Response factor:     | 9.69E+03  |           |                |                                     |
| Polyphenols analysed in positive ionization mode |                      |           |           |                |                                     |
| Compounds                                        | Linear range (µg/mL) | Linearity |           |                |                                     |
|                                                  |                      | Slope     | Intercept | R <sup>2</sup> | Lower limit of quantitation (µg/mL) |
| Cyanidin-3- <i>O</i> -glucoside                  | 0.5-10               | 1.44E+06  | 7.75E+05  | 0.992          | 0.5                                 |
| Peonidin 3- <i>O</i> -glucoside                  | Response factor:     | 5.93E+05  |           |                |                                     |
| Delphinidin (aglycone)                           | Response factor:     | 1.33E+04  |           |                |                                     |

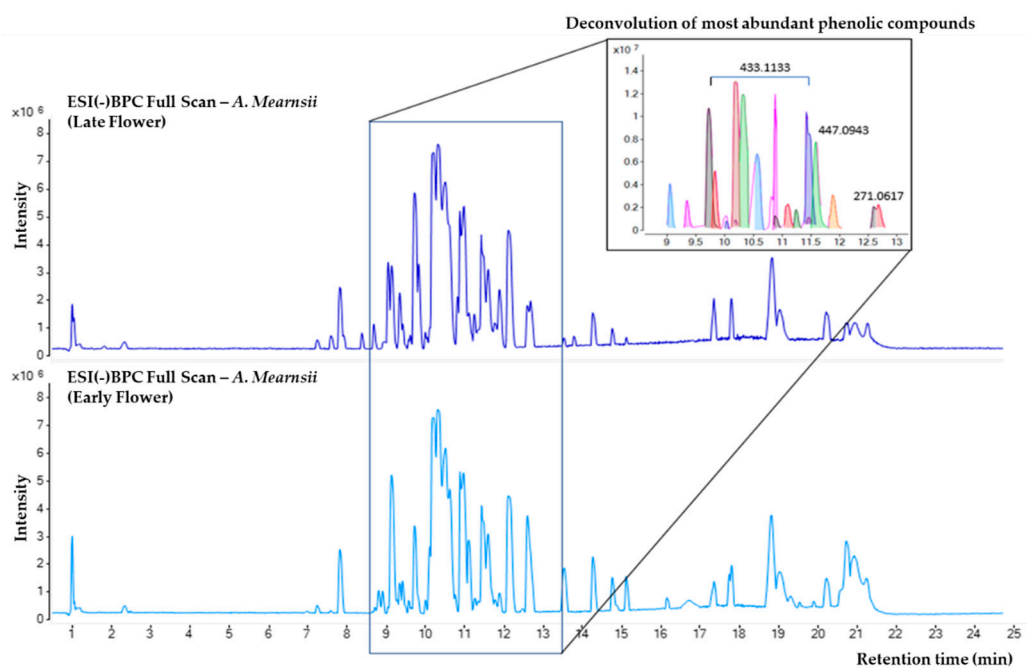

**Figure S1.** Representative Base Peak Chromatogram (BPC) profile (negative and positive ion mode) from the extract of *A. maernsii*. The  $m/z$  values for the most abundant compounds are given.

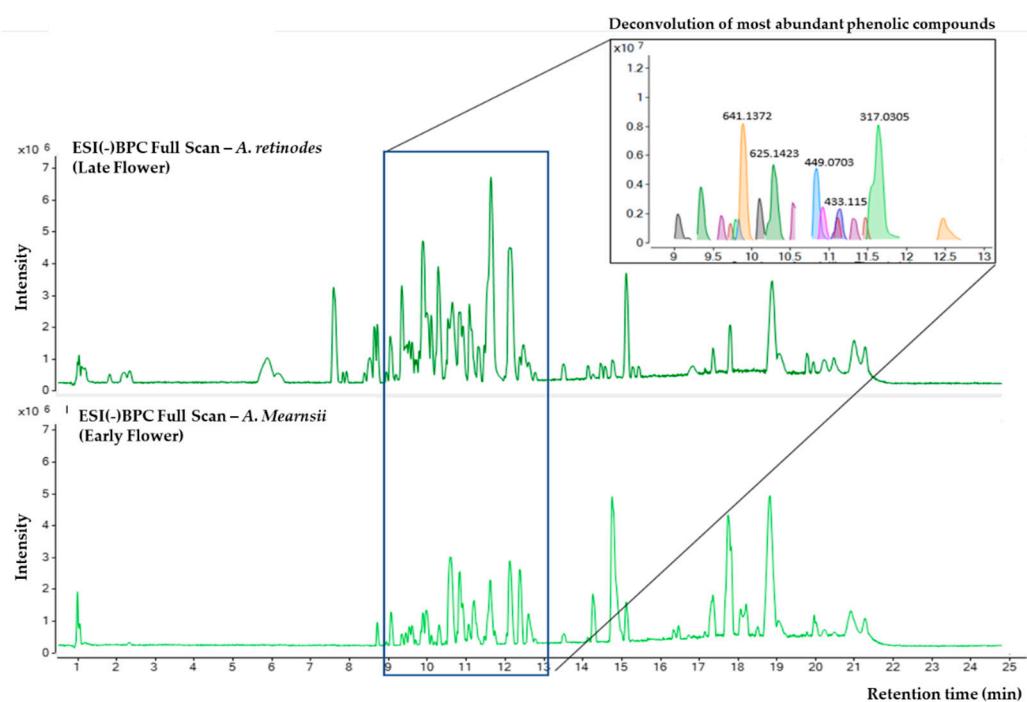

**Figure S2.** Representative Base Peak Chromatogram (BPC) profile (negative and positive ion mode) from the extract of *A. retinodes*. The  $m/z$  values for the most abundant compounds are given.
